# Supplementary material
Source: Springer Nature journal article supplement (https://www.springermedizin.de/resource/supplementary/13014_2012_803_MOESM6_ESM.pdf/9634764)

**A*****M059K***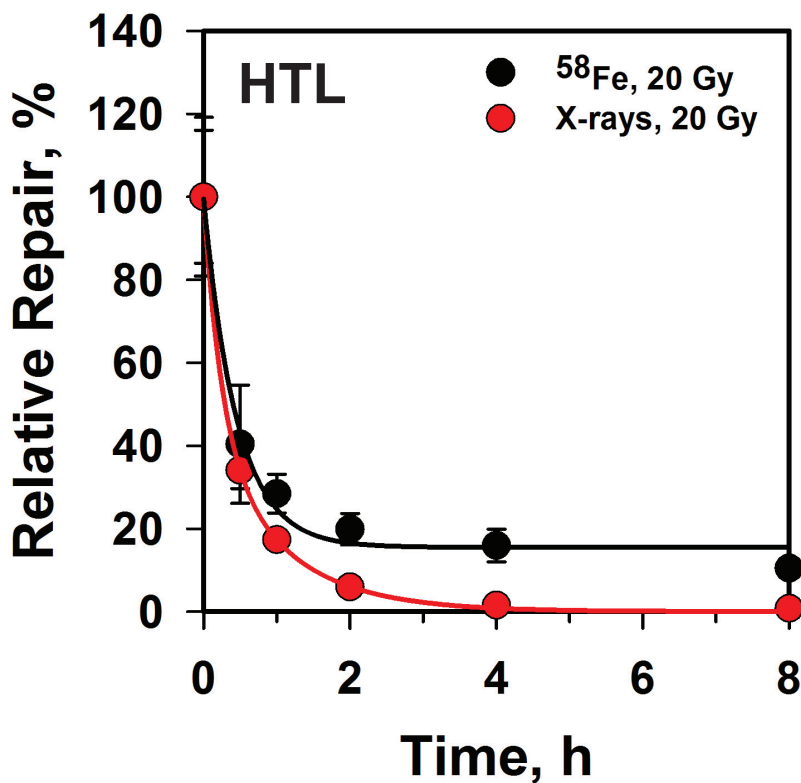**B**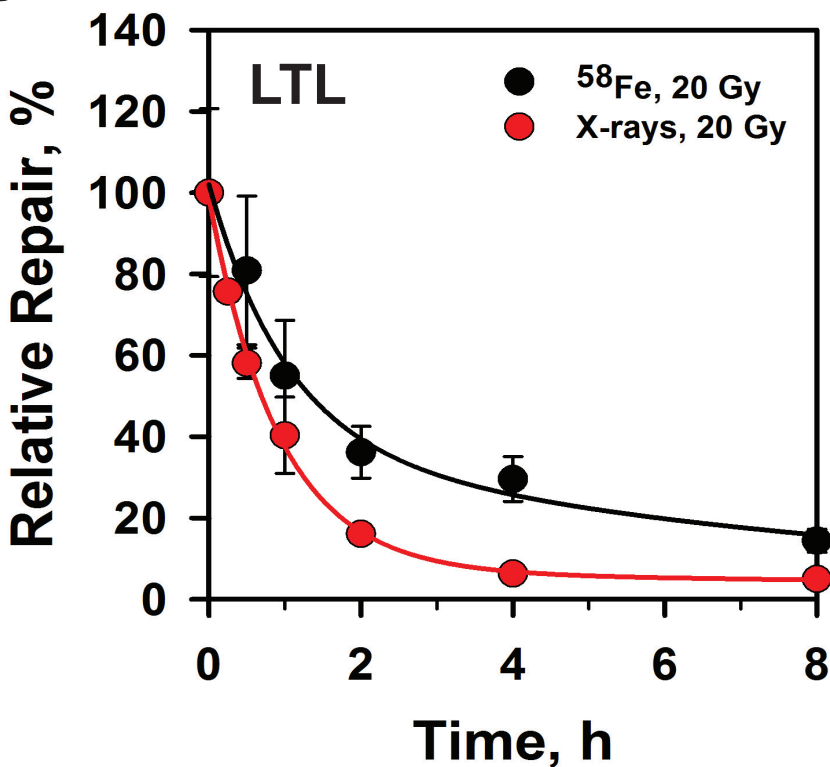

Supplement: MOESM6 [file 9634764]
